# Supplementary material
Source: publisher figshare collection journal article supplement (https://wiley.figshare.com/articles/dataset/_/3552507)
Supplement: Supplementary file 1 [file 1]

**Victor Johansson, Thomas Ranius, and Tord Snäll. Year. Epiphyte metapopulation dynamics are explained by species traits, connectivity, and patch dynamics. *Ecology* VOL:pp–pp.**

**Appendix B.** Modeling colonization probability and connectivity.

We modeled the colonization probability ( $C_i$ ) as a function of connectivity ( $S_i$ ) as

$$C_i = 1 - e^{-S_i}. \quad (\text{B.1})$$

This relationship assumes independent colonization success among propagules, which is biologically reasonable for our study species. The original IFM used a sigmoid relationship, which is a way to model Allee effects (Hanski 1994). Our connectivity measure ( $S_i$ ) assumes that propagules are dispersed from unknown background sources at long distance, or from local surrounding occupied patches according to a dispersal kernel. Specifically,

$$S_i = \Xi + \Phi \sum_{j \neq i} f(r_{ij}), \quad (\text{B.2})$$

where  $\Phi$  is the colonization parameter that includes the rate of emigration of dispersal propagules from occupied patches, and the propagules establishment ability (“the force of infection” using epidemiological terminology). The parameter  $\Xi$  denotes the rate of background deposition of dispersal propagules, which essentially models long-distance dispersal. The function  $f(r_{ij})$  is the dispersal kernel, where  $r_{ij}$  is the distance in meters between trees  $i$  and  $j$ . Specifically,  $f(r)$  is the probability density that a propagules settles at a location  $(x, y)$  with distance  $r = \sqrt{x^2 + y^2}$  from its point of release. The variable  $p_j = 1$  if tree  $j$  is occupied by the species; otherwise  $p_j = 0$ . We use the dispersal kernel:

$$f(r) = \frac{\alpha^2}{2\pi} e^{-\alpha * r}, \quad (\text{B.3})$$

where  $\alpha$  is a parameter regulating the dispersal range. The kernel has been normalized so that it represents a two-dimensional probability density, i.e.,  $\int_0^\infty f(r) * 2\pi r dr = 1$ .

LITERATURE CITED

Hanski, I. 1994. A practical model of metapopulation dynamics. *Journal of Animal Ecology* 63:151–162.
